# Supplementary material
Source: PubMed Central journal article supplement (PMC10405225)
Supplement: NIHMS1919565-supplement-supplemental_material.pdf [file NIHMS1919565-supplement-supplemental_material.pdf]

## Supplemental Data

### Figure S1

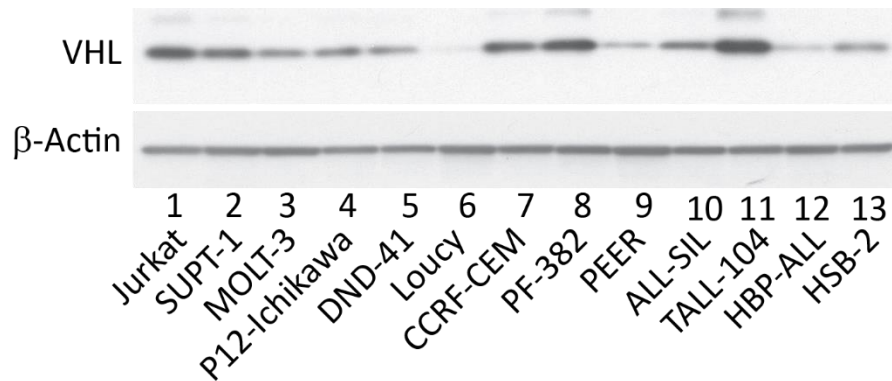

**Figure S1- Steady state protein levels of VHL in 13 T-ALL cell lines.** Western analysis of VHL in the 13 T-ALL lines tested for sensitivity to DT2216 indicates that there is no correlation of VHL levels with DT2216 response. For example, Loucy is the most sensitive cell lines and yet has the lowest level of VHL protein while SUPT1 is the most resistant cell line but has a moderate level of VHL.

**Figure S2**

Jurkat

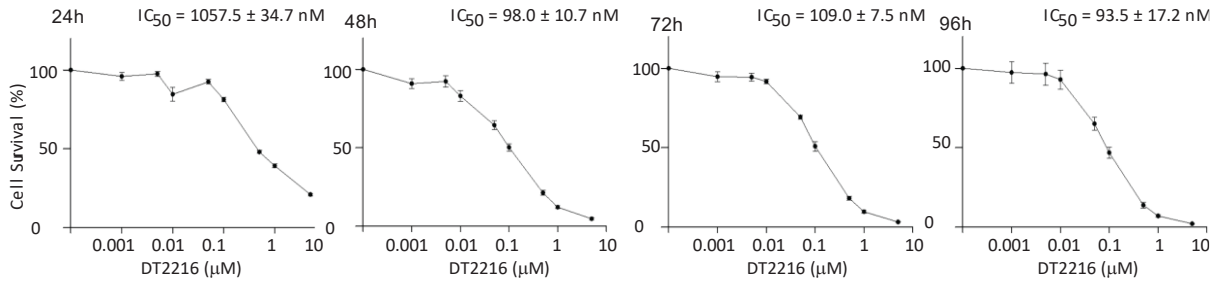

SupT1

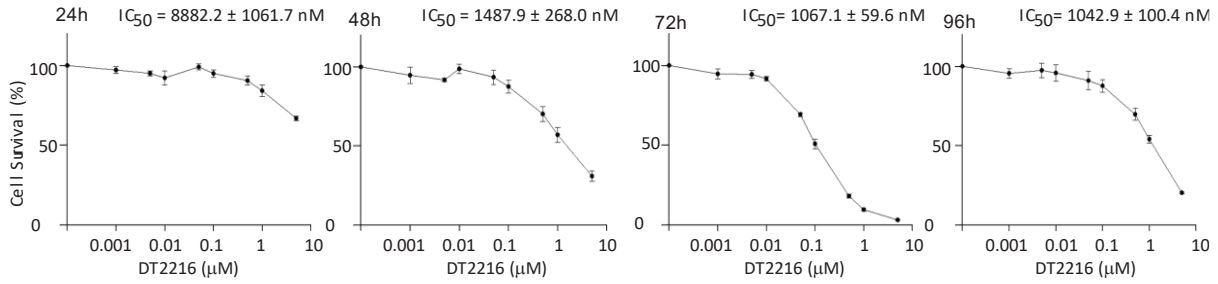

Loucy

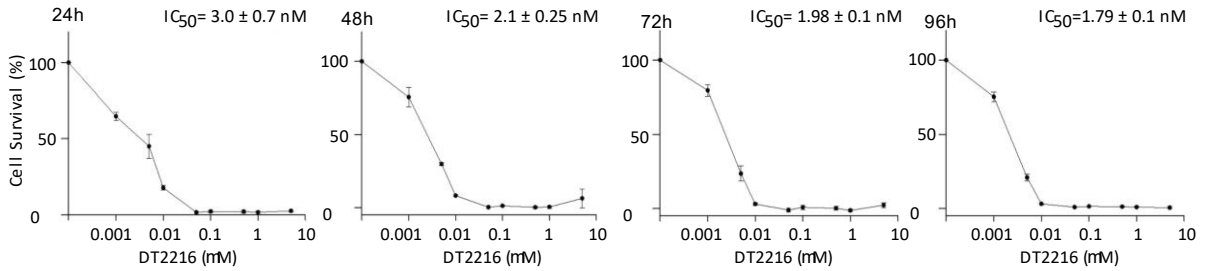

MOLT3

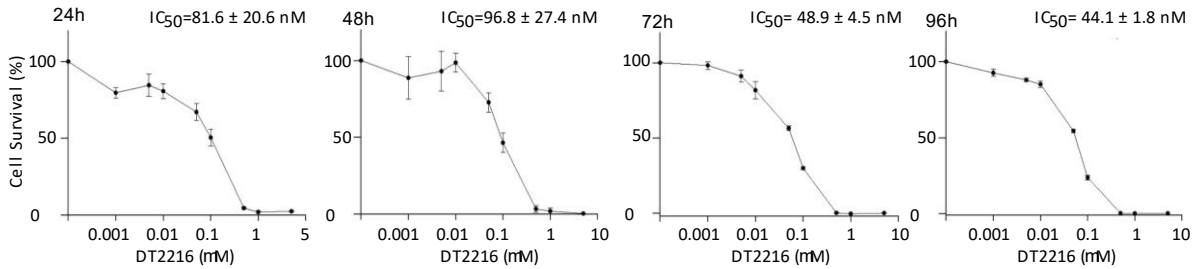

### DND41

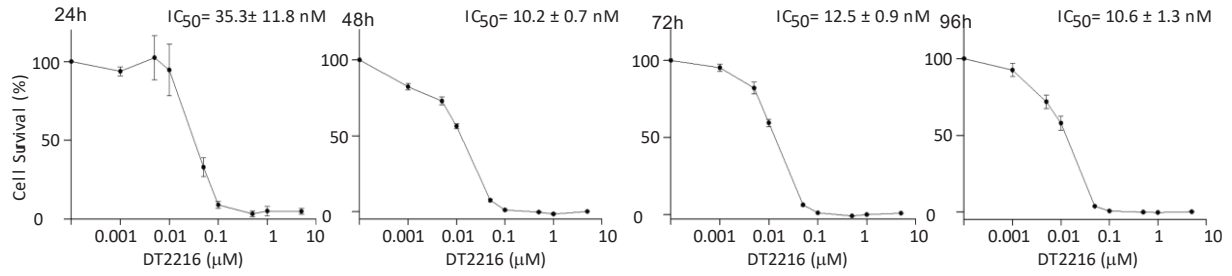

### P12-Ichikawa

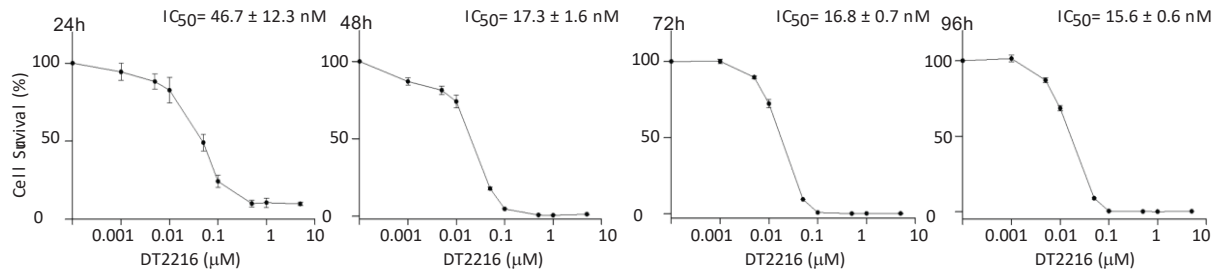

### CCRF-CEM

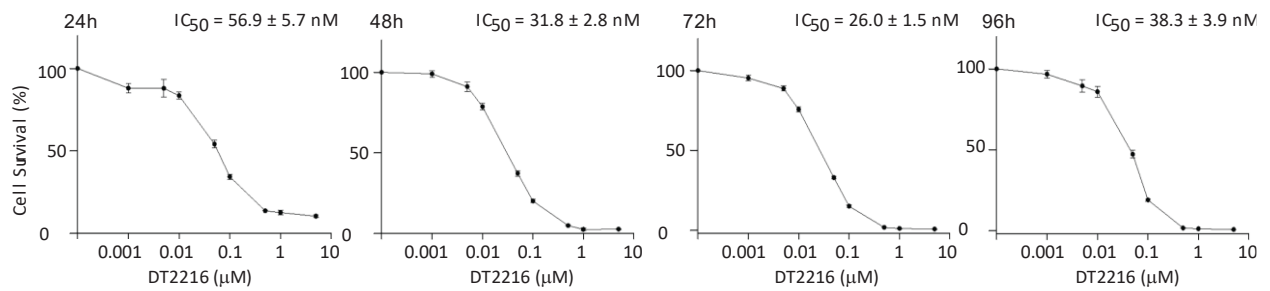

### PF382

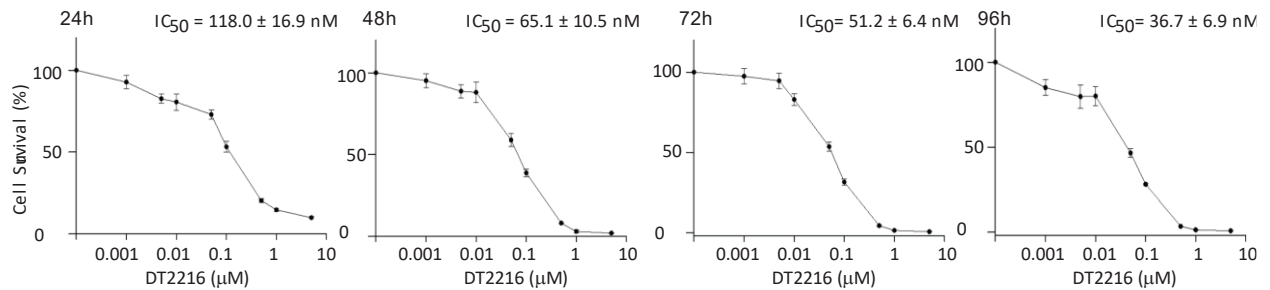

PEER

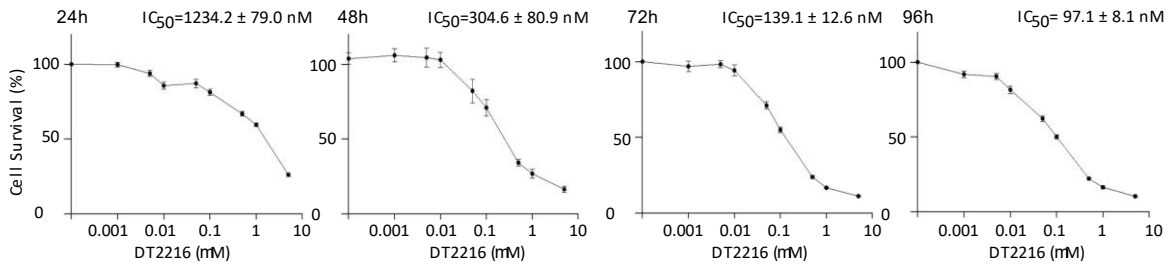

ALL-SIL

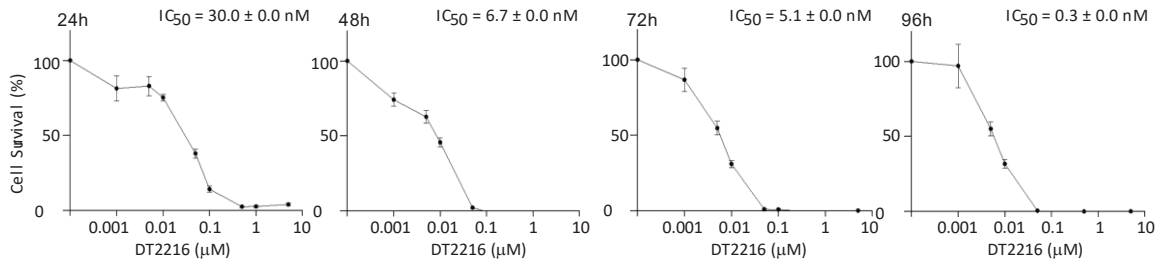

TALL-104

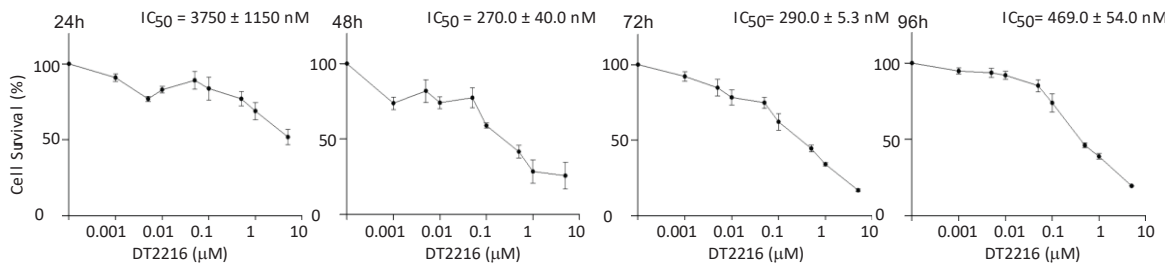

HBP-ALL

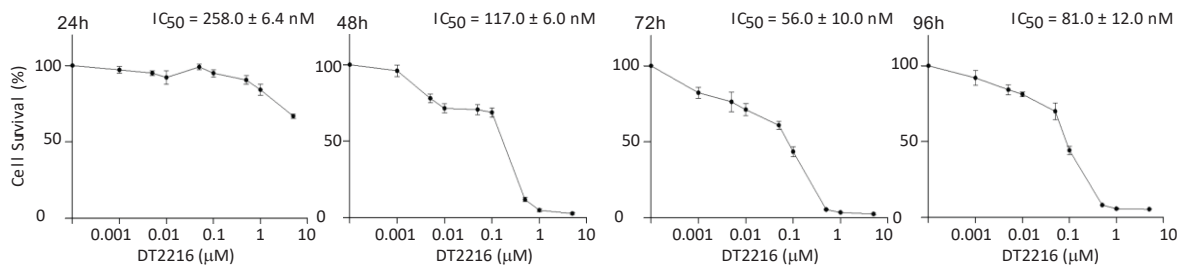

HSB-2

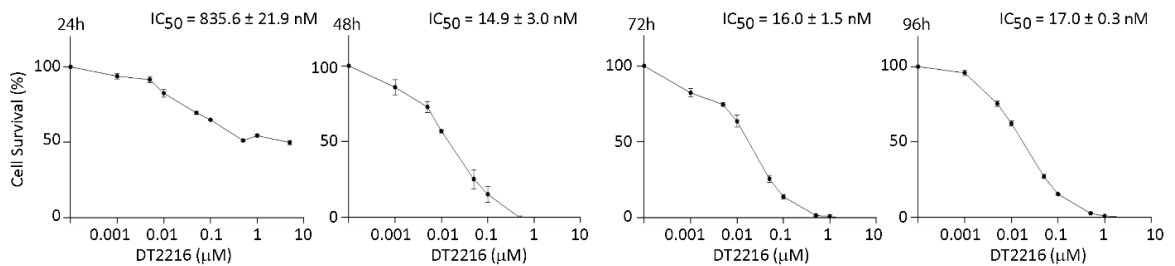

**Figure S2. DT2216 survival curves for the 13 T-ALL lines.** MTS assays in varying concentrations of DT2216 after 24, 48, 72, and 96 hours of exposure. All data points were performed in quadruplicate.

**Figure S3**

| Cell Line    | IC50 (nM)        |                |                |                |
|--------------|------------------|----------------|----------------|----------------|
|              | 24 h             | 48 h           | 72 h           | 96 h           |
| Jurkat       | 1057.5 ± 34.7    | 98.0 ± 10.7    | 109.0 ± 7.5    | 93.5 ± 17.2    |
| SUP-T1       | 8882.2 ± 1061.7  | 1487.9 ± 268.0 | 1067.1 ± 59.6  | 1042.9 ± 100.4 |
| MOLT-3       | 81.60 ± 20.67    | 96.83 ± 27.42  | 48.89 ± 4.52   | 44.08 ± 1.84   |
| P12-Ichikawa | 46.74 ± 12.38    | 17.28 ± 1.66   | 16.82 ± 0.72   | 15.60 ± 0.58   |
| DND-41       | 35.32 ± 11.87    | 10.19 ± 0.73   | 12.58 ± 0.96   | 10.57 ± 1.32   |
| Loucy        | 3.00 ± 0.71      | 2.14 ± 0.25    | 1.98 ± 0.15    | 1.79 ± 0.17    |
| CCRF-CEM     | 56.85 ± 5.74     | 31.82 ± 2.84   | 25.95 ± 1.45   | 38.26 ± 3.89   |
| PF-382       | 118.00 ± 16.91   | 65.07 ± 10.47  | 51.18 ± 6.37   | 36.68 ± 6.85   |
| PEER         | 1234.25 ± 79.00  | 304.63 ± 80.97 | 139.05 ± 12.61 | 97.05 ± 8.10   |
| ALL-SIL      | 25.69 ± 3.72     | 6.67 ± 0.97    | 5.11 ± 0.47    | 0.35 ± 0.0     |
| TALL-104     | 3749.75 ± 1152.7 | 274.8 ± 36.45  | 289.63 ± 53.19 | 468.72 ± 53.73 |
| HBP-ALL      | 257.50 ± 64.17   | 117.18 ± 6.25  | 56.34 ± 9.60   | 80.52 ± 12.45  |
| HSB-2        | 835.6 ± 21.9     | 14.9 ± 3.0     | 16.0 ± 1.5     | 17.0 ± 0.3     |

**Figure S3- IC50 values over time of exposure to DT2216.** MTS assays were performed on 13 T-ALL cell lines. Response to DT2216 appeared to plateau at 48 hrs so this was chosen as the main analytic timepoint.

## Figure S4

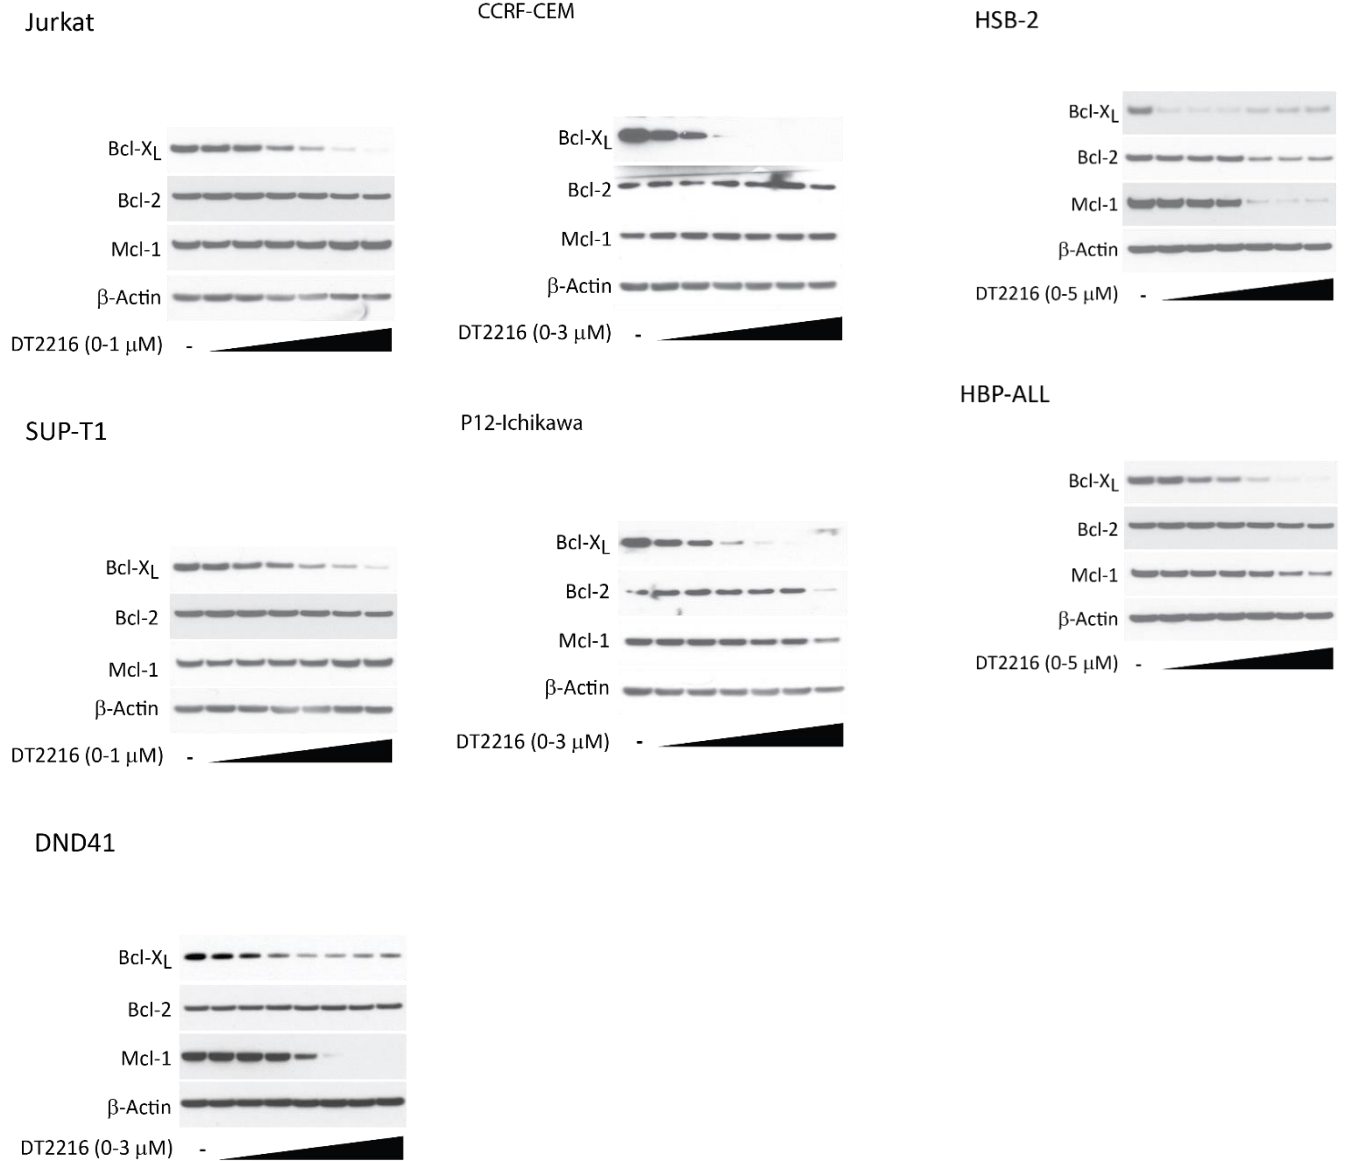



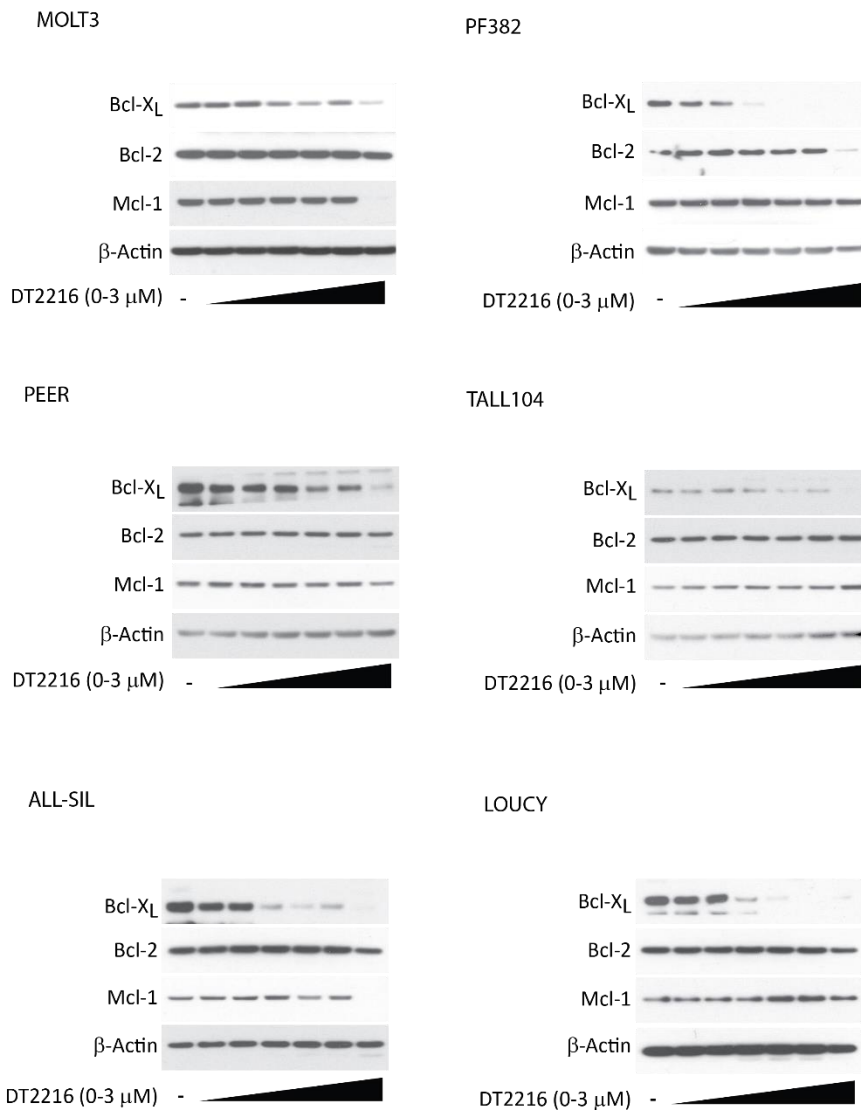

**Figure S4. BCL-XL degradation from DT2216 after 24 hrs.** Western analysis of BCL-XL, BCL-2 and MCL-1 protein levels after 24 hrs of exposure to varying concentrations of DT2216. Concentrations of DT2216 were 4, 12, 36, 110, 330, 1000, and 3000 nM. Even in the resistant SUP-T1 cell line, BCL-XL was degraded efficiently, albeit at significantly higher concentrations than other cell lines. BCL-2 and MCL-1 were not induced by DT2216. In some cell lines, MCL-1 was degraded due to activation of Caspases as reported [8].

**Figure S5**

SUP-T1

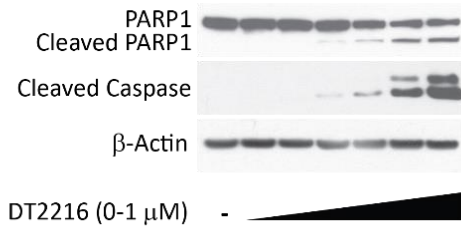

**Figure S5- Western analysis of SUP-T1 cells of activation of apoptosis-** Cleaved caspase 3 and cleaved PARP1 indicate that apoptosis is still activated in SUP-T1 cells even at concentrations of DT2216 where SUP-T1 cells survive (1 mM here and SUP-T1 IC<sub>50</sub> = 1.5 mM). Concentrations of DT2216 were 4, 12, 36, 110, 330, 1000, and 3000 nM.

**Table S1- T-ALL cell lines with growth media and doubling time**

| <b>Cell Line</b> | <b>Growth Medium</b> | <b>Doubling Time</b> |
|------------------|----------------------|----------------------|
| CCRF-CEM         | RPMI + 10% FBS       | 24-30 hr             |
| Jurkat           | RPMI + 10% FBS       | 25-35 hr             |
| Loucy            | RPMI + 10% FBS       | 50-60 hr             |
| MOLT-3           | RPMI + 10% FBS       | 40 hr                |
| SUP-T1           | RPMI + 10% FBS       | 30 hr                |
| TALL-104         | RPMI + 20% FBS + IL2 | 24 hr                |
| ALL-SIL          | RPMI + 20% FBS       | 48 hr                |
| DND-41           | RPMI + 10% FBS       | 35 hr                |
| HBP-ALL          | RPMI + 20% FBS       | 50 hr                |
| HSB-2            | Iscove + 10% FBS     | 40 hr                |
| P12-ICHIKAWA     | RPMI + 10% FBS       | 40-50 hr             |
| PEER             | RPMI + 20% FBS       | 50-60 hr             |
| PF-382           | RPMI + 10% FBS       | 70 hr                |
